# Supplementary material
Source: HighWire-hosted journal article supplement (https://jnis.bmj.com/content/15/10/1001)
Supplement: inline-supplementary-material-1 [file inline-supplementary-material-1.pdf]

Poly(2-methoxyethyl acrylate) (PMEA) improves the thromboresistance of FRED flow diverters:  
A thrombogenic evaluation of flow diverters with human blood under flow conditions

SUPPLEMENTAL MATERIALS

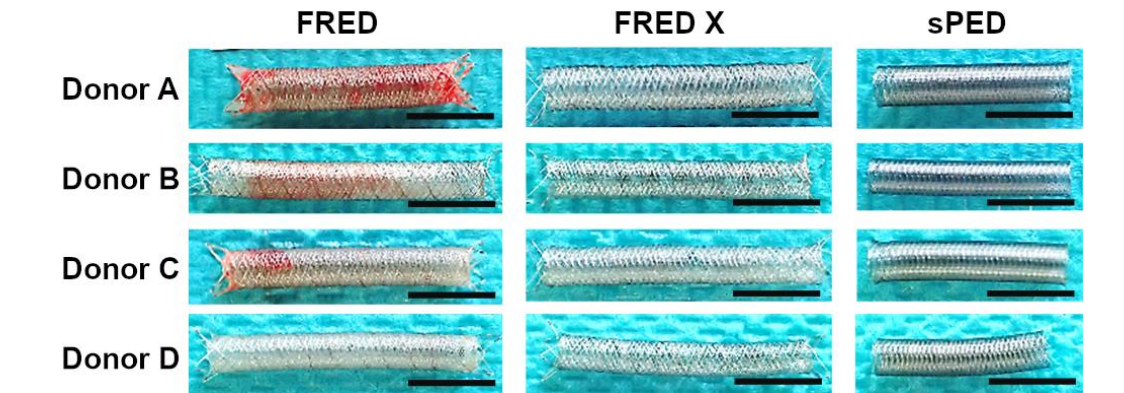

**Supplemental Figure 1.** Visual observation of blood coagulation on each flow diverter. Scale bars: 1 cm. FRED, Flow Redirection Endoluminal Device; FRED X, FRED with X Technology; sPED, Pipeline Flex with Shield Technology.

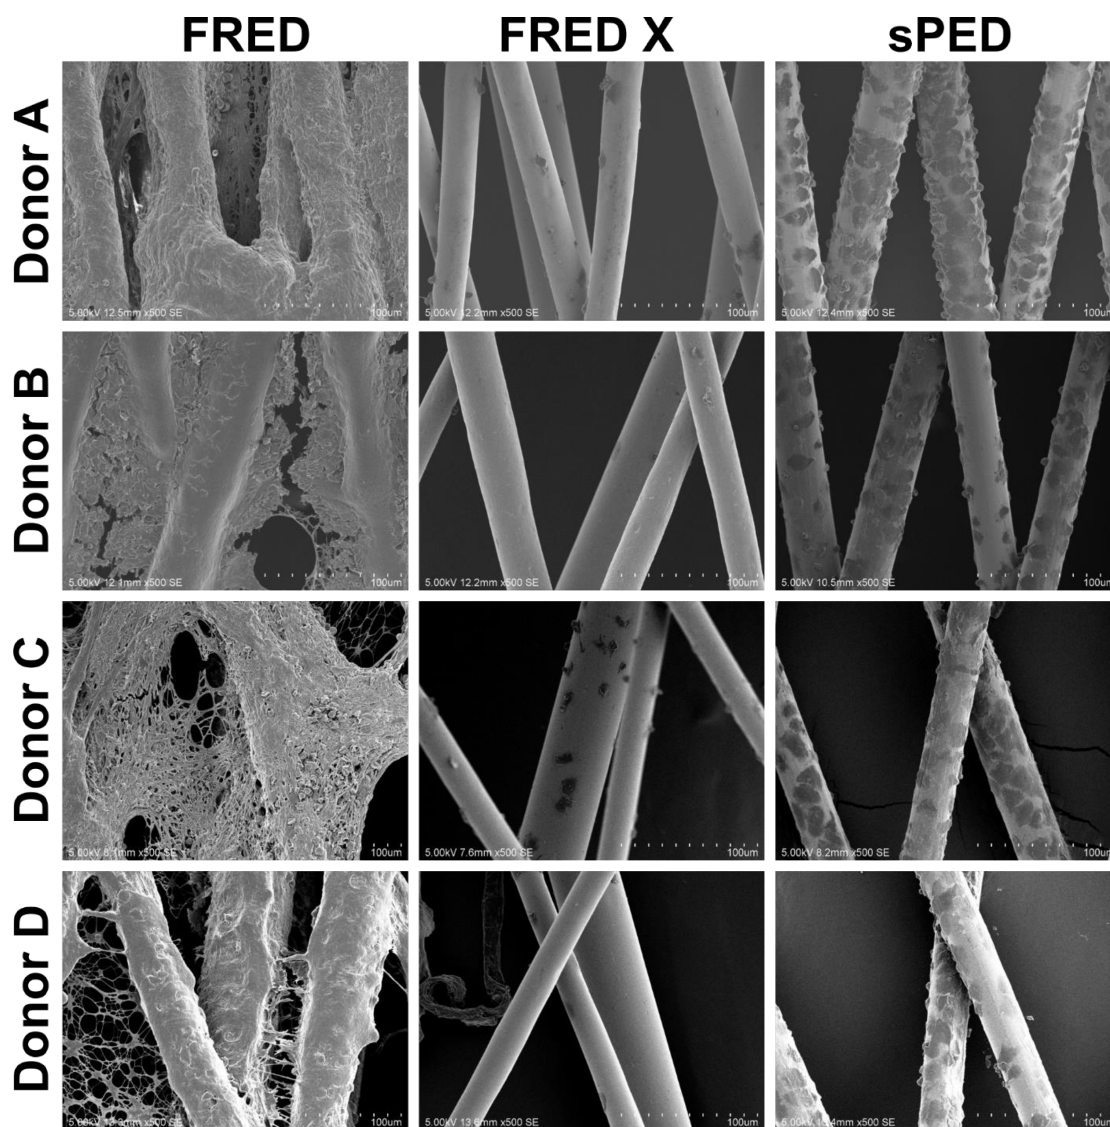

**Supplemental Figure 2.** Scanning electron microscope observation of blood coagulation after circulation. Scale bars: 100 µm. FRED, Flow Redirection Endoluminal Device; FRED X, FRED with X Technology; sPED, Pipeline Flex with Shield Technology.
