# Supplementary material
Source: HighWire-hosted journal article supplement (https://jnis.bmj.com/content/15/10/1001)
Supplement: inline-supplementary-material-2 [file inline-supplementary-material-2.pdf]

## ICMJE DISCLOSURE FORM

**Date:** 5/18/2022

**Your Name:** Aaron Baldwin

**Manuscript Title:** POLY(2-METHOXYETHYL ACRYLATE) (PMEA) IMPROVES THROMBORESISTANCE OF FRED FLOW DIVERTERS: A THROMBOGENIC EVALUATION OF THE FLOW DIVERTERS WITH HUMAN BLOOD UNDER FLOW CONDITIONS

**Manuscript Number (if known):** [Click or tap here to enter text.](#)

In the interest of transparency, we ask you to disclose all relationships/activities/interests listed below that are related to the content of your manuscript. "Related" means any relation with for-profit or not-for-profit third parties whose interests may be affected by the content of the manuscript. Disclosure represents a commitment to transparency and does not necessarily indicate a bias. If you are in doubt about whether to list a relationship/activity/interest, it is preferable that you do so.

The author's relationships/activities/interests should be defined broadly. For example, if your manuscript pertains to the epidemiology of hypertension, you should declare all relationships with manufacturers of antihypertensive medication, even if that medication is not mentioned in the manuscript.

In item #1 below, report all support for the work reported in this manuscript without time limit. For all other items, the time frame for disclosure is the past 36 months.

|                                                    | Name all entities with whom you have this relationship or indicate none (add rows as needed)                                                                                   | Specifications/Comments (e.g., if payments were made to you or to your institution)                                                                                                                                                                                                                                                                                          |                   |  |                  |  |                                      |                                           |
|----------------------------------------------------|--------------------------------------------------------------------------------------------------------------------------------------------------------------------------------|------------------------------------------------------------------------------------------------------------------------------------------------------------------------------------------------------------------------------------------------------------------------------------------------------------------------------------------------------------------------------|-------------------|--|------------------|--|--------------------------------------|-------------------------------------------|
| Time frame: Since the initial planning of the work |                                                                                                                                                                                |                                                                                                                                                                                                                                                                                                                                                                              |                   |  |                  |  |                                      |                                           |
| <b>1</b>                                           | All support for the present manuscript (e.g., funding, provision of study materials, medical writing, article processing charges, etc.)<br><b>No time limit for this item.</b> | <input type="checkbox"/> <b>None</b><br><table border="1" style="width: 100%; border-collapse: collapse;"> <tr> <td style="width: 60%;">MicroVention Inc.</td> <td></td> </tr> <tr> <td>Terumo Co., Ltd.</td> <td></td> </tr> <tr> <td>Hyperion Medical Communications, LLC</td> <td style="font-size: small;">Click the tab key to add additional rows.</td> </tr> </table> | MicroVention Inc. |  | Terumo Co., Ltd. |  | Hyperion Medical Communications, LLC | Click the tab key to add additional rows. |
| MicroVention Inc.                                  |                                                                                                                                                                                |                                                                                                                                                                                                                                                                                                                                                                              |                   |  |                  |  |                                      |                                           |
| Terumo Co., Ltd.                                   |                                                                                                                                                                                |                                                                                                                                                                                                                                                                                                                                                                              |                   |  |                  |  |                                      |                                           |
| Hyperion Medical Communications, LLC               | Click the tab key to add additional rows.                                                                                                                                      |                                                                                                                                                                                                                                                                                                                                                                              |                   |  |                  |  |                                      |                                           |
| Time frame: past 36 months                         |                                                                                                                                                                                |                                                                                                                                                                                                                                                                                                                                                                              |                   |  |                  |  |                                      |                                           |
| <b>2</b>                                           | Grants or contracts from any entity (if not indicated in item #1 above).                                                                                                       | <input checked="" type="checkbox"/> <b>None</b><br><table border="1" style="width: 100%; border-collapse: collapse;"> <tr><td style="width: 60%; height: 20px;"></td><td></td></tr> <tr><td style="height: 20px;"></td><td></td></tr> <tr><td style="height: 20px;"></td><td></td></tr> </table>                                                                             |                   |  |                  |  |                                      |                                           |
|                                                    |                                                                                                                                                                                |                                                                                                                                                                                                                                                                                                                                                                              |                   |  |                  |  |                                      |                                           |
|                                                    |                                                                                                                                                                                |                                                                                                                                                                                                                                                                                                                                                                              |                   |  |                  |  |                                      |                                           |
|                                                    |                                                                                                                                                                                |                                                                                                                                                                                                                                                                                                                                                                              |                   |  |                  |  |                                      |                                           |

|    |                                                                                                              | Name all entities with whom you have this relationship or indicate none (add rows as needed) | Specifications/Comments (e.g., if payments were made to you or to your institution) |
|----|--------------------------------------------------------------------------------------------------------------|----------------------------------------------------------------------------------------------|-------------------------------------------------------------------------------------|
| 3  | Royalties or licenses                                                                                        | <input checked="" type="checkbox"/> None                                                     |                                                                                     |
|    |                                                                                                              |                                                                                              |                                                                                     |
|    |                                                                                                              |                                                                                              |                                                                                     |
| 4  | Consulting fees                                                                                              | <input checked="" type="checkbox"/> None                                                     |                                                                                     |
|    |                                                                                                              |                                                                                              |                                                                                     |
|    |                                                                                                              |                                                                                              |                                                                                     |
| 5  | Payment or honoraria for lectures, presentations, speakers bureaus, manuscript writing or educational events | <input checked="" type="checkbox"/> None                                                     |                                                                                     |
|    |                                                                                                              |                                                                                              |                                                                                     |
|    |                                                                                                              |                                                                                              |                                                                                     |
| 6  | Payment for expert testimony                                                                                 | <input checked="" type="checkbox"/> None                                                     |                                                                                     |
|    |                                                                                                              |                                                                                              |                                                                                     |
|    |                                                                                                              |                                                                                              |                                                                                     |
| 7  | Support for attending meetings and/or travel                                                                 | <input checked="" type="checkbox"/> None                                                     |                                                                                     |
|    |                                                                                                              |                                                                                              |                                                                                     |
|    |                                                                                                              |                                                                                              |                                                                                     |
| 8  | Patents planned, issued or pending                                                                           | <input checked="" type="checkbox"/> None                                                     |                                                                                     |
|    |                                                                                                              |                                                                                              |                                                                                     |
|    |                                                                                                              |                                                                                              |                                                                                     |
| 9  | Participation on a Data Safety Monitoring Board or Advisory Board                                            | <input checked="" type="checkbox"/> None                                                     |                                                                                     |
|    |                                                                                                              |                                                                                              |                                                                                     |
|    |                                                                                                              |                                                                                              |                                                                                     |
| 10 | Leadership or fiduciary role in other board,                                                                 | <input checked="" type="checkbox"/> None                                                     |                                                                                     |
|    |                                                                                                              |                                                                                              |                                                                                     |

|                                                                                                                                                                                                                                                               |                                                                                  | Name all entities with whom you have this relationship or indicate none (add rows as needed)                                                                         | Specifications/Comments (e.g., if payments were made to you or to your institution) |  |  |  |                                                                                      |  |                                                                                                                   |  |  |  |  |  |  |
|---------------------------------------------------------------------------------------------------------------------------------------------------------------------------------------------------------------------------------------------------------------|----------------------------------------------------------------------------------|----------------------------------------------------------------------------------------------------------------------------------------------------------------------|-------------------------------------------------------------------------------------|--|--|--|--------------------------------------------------------------------------------------|--|-------------------------------------------------------------------------------------------------------------------|--|--|--|--|--|--|
|                                                                                                                                                                                                                                                               | society, committee or advocacy group, paid or unpaid                             | <table border="1"><tr><td> </td><td> </td></tr><tr><td> </td><td> </td></tr></table>                                                                                 |                                                                                     |  |  |  | <table border="1"><tr><td> </td><td> </td></tr><tr><td> </td><td> </td></tr></table> |  |                                                                                                                   |  |  |  |  |  |  |
|                                                                                                                                                                                                                                                               |                                                                                  |                                                                                                                                                                      |                                                                                     |  |  |  |                                                                                      |  |                                                                                                                   |  |  |  |  |  |  |
|                                                                                                                                                                                                                                                               |                                                                                  |                                                                                                                                                                      |                                                                                     |  |  |  |                                                                                      |  |                                                                                                                   |  |  |  |  |  |  |
|                                                                                                                                                                                                                                                               |                                                                                  |                                                                                                                                                                      |                                                                                     |  |  |  |                                                                                      |  |                                                                                                                   |  |  |  |  |  |  |
|                                                                                                                                                                                                                                                               |                                                                                  |                                                                                                                                                                      |                                                                                     |  |  |  |                                                                                      |  |                                                                                                                   |  |  |  |  |  |  |
| <b>11</b>                                                                                                                                                                                                                                                     | Stock or stock options                                                           | <input checked="" type="checkbox"/> <b>None</b><br><table border="1"><tr><td> </td><td> </td></tr><tr><td> </td><td> </td></tr><tr><td> </td><td> </td></tr></table> |                                                                                     |  |  |  |                                                                                      |  | <table border="1"><tr><td> </td><td> </td></tr><tr><td> </td><td> </td></tr><tr><td> </td><td> </td></tr></table> |  |  |  |  |  |  |
|                                                                                                                                                                                                                                                               |                                                                                  |                                                                                                                                                                      |                                                                                     |  |  |  |                                                                                      |  |                                                                                                                   |  |  |  |  |  |  |
|                                                                                                                                                                                                                                                               |                                                                                  |                                                                                                                                                                      |                                                                                     |  |  |  |                                                                                      |  |                                                                                                                   |  |  |  |  |  |  |
|                                                                                                                                                                                                                                                               |                                                                                  |                                                                                                                                                                      |                                                                                     |  |  |  |                                                                                      |  |                                                                                                                   |  |  |  |  |  |  |
|                                                                                                                                                                                                                                                               |                                                                                  |                                                                                                                                                                      |                                                                                     |  |  |  |                                                                                      |  |                                                                                                                   |  |  |  |  |  |  |
|                                                                                                                                                                                                                                                               |                                                                                  |                                                                                                                                                                      |                                                                                     |  |  |  |                                                                                      |  |                                                                                                                   |  |  |  |  |  |  |
|                                                                                                                                                                                                                                                               |                                                                                  |                                                                                                                                                                      |                                                                                     |  |  |  |                                                                                      |  |                                                                                                                   |  |  |  |  |  |  |
| <b>12</b>                                                                                                                                                                                                                                                     | Receipt of equipment, materials, drugs, medical writing, gifts or other services | <input checked="" type="checkbox"/> <b>None</b><br><table border="1"><tr><td> </td><td> </td></tr><tr><td> </td><td> </td></tr><tr><td> </td><td> </td></tr></table> |                                                                                     |  |  |  |                                                                                      |  | <table border="1"><tr><td> </td><td> </td></tr><tr><td> </td><td> </td></tr><tr><td> </td><td> </td></tr></table> |  |  |  |  |  |  |
|                                                                                                                                                                                                                                                               |                                                                                  |                                                                                                                                                                      |                                                                                     |  |  |  |                                                                                      |  |                                                                                                                   |  |  |  |  |  |  |
|                                                                                                                                                                                                                                                               |                                                                                  |                                                                                                                                                                      |                                                                                     |  |  |  |                                                                                      |  |                                                                                                                   |  |  |  |  |  |  |
|                                                                                                                                                                                                                                                               |                                                                                  |                                                                                                                                                                      |                                                                                     |  |  |  |                                                                                      |  |                                                                                                                   |  |  |  |  |  |  |
|                                                                                                                                                                                                                                                               |                                                                                  |                                                                                                                                                                      |                                                                                     |  |  |  |                                                                                      |  |                                                                                                                   |  |  |  |  |  |  |
|                                                                                                                                                                                                                                                               |                                                                                  |                                                                                                                                                                      |                                                                                     |  |  |  |                                                                                      |  |                                                                                                                   |  |  |  |  |  |  |
|                                                                                                                                                                                                                                                               |                                                                                  |                                                                                                                                                                      |                                                                                     |  |  |  |                                                                                      |  |                                                                                                                   |  |  |  |  |  |  |
| <b>13</b>                                                                                                                                                                                                                                                     | Other financial or non-financial interests                                       | <input checked="" type="checkbox"/> <b>None</b><br><table border="1"><tr><td> </td><td> </td></tr><tr><td> </td><td> </td></tr><tr><td> </td><td> </td></tr></table> |                                                                                     |  |  |  |                                                                                      |  | <table border="1"><tr><td> </td><td> </td></tr><tr><td> </td><td> </td></tr><tr><td> </td><td> </td></tr></table> |  |  |  |  |  |  |
|                                                                                                                                                                                                                                                               |                                                                                  |                                                                                                                                                                      |                                                                                     |  |  |  |                                                                                      |  |                                                                                                                   |  |  |  |  |  |  |
|                                                                                                                                                                                                                                                               |                                                                                  |                                                                                                                                                                      |                                                                                     |  |  |  |                                                                                      |  |                                                                                                                   |  |  |  |  |  |  |
|                                                                                                                                                                                                                                                               |                                                                                  |                                                                                                                                                                      |                                                                                     |  |  |  |                                                                                      |  |                                                                                                                   |  |  |  |  |  |  |
|                                                                                                                                                                                                                                                               |                                                                                  |                                                                                                                                                                      |                                                                                     |  |  |  |                                                                                      |  |                                                                                                                   |  |  |  |  |  |  |
|                                                                                                                                                                                                                                                               |                                                                                  |                                                                                                                                                                      |                                                                                     |  |  |  |                                                                                      |  |                                                                                                                   |  |  |  |  |  |  |
|                                                                                                                                                                                                                                                               |                                                                                  |                                                                                                                                                                      |                                                                                     |  |  |  |                                                                                      |  |                                                                                                                   |  |  |  |  |  |  |
| <p><b>Please place an "X" next to the following statement to indicate your agreement:</b></p> <p><input checked="" type="checkbox"/> I certify that I have answered every question and have not altered the wording of any of the questions on this form.</p> |                                                                                  |                                                                                                                                                                      |                                                                                     |  |  |  |                                                                                      |  |                                                                                                                   |  |  |  |  |  |  |

## ICMJE DISCLOSURE FORM

**Date:** 5/18/2022

**Your Name:** Atsushi Kaneki

**Manuscript Title:** POLY(2-METHOXYETHYL ACRYLATE) (PMEA) IMPROVES THROMBORESISTANCE OF FRED FLOW DIVERTERS: A THROMBOGENIC EVALUATION OF THE FLOW DIVERTERS WITH HUMAN BLOOD UNDER FLOW CONDITIONS

**Manuscript Number (if known):** [Click or tap here to enter text.](#)

In the interest of transparency, we ask you to disclose all relationships/activities/interests listed below that are related to the content of your manuscript. "Related" means any relation with for-profit or not-for-profit third parties whose interests may be affected by the content of the manuscript. Disclosure represents a commitment to transparency and does not necessarily indicate a bias. If you are in doubt about whether to list a relationship/activity/interest, it is preferable that you do so.

The author's relationships/activities/interests should be defined broadly. For example, if your manuscript pertains to the epidemiology of hypertension, you should declare all relationships with manufacturers of antihypertensive medication, even if that medication is not mentioned in the manuscript.

In item #1 below, report all support for the work reported in this manuscript without time limit. For all other items, the time frame for disclosure is the past 36 months.

|                                                    | Name all entities with whom you have this relationship or indicate none (add rows as needed)                                                                                   | Specifications/Comments (e.g., if payments were made to you or to your institution)                                                                                                                                                                                                                                                                                          |                   |  |                  |  |                                      |                                           |
|----------------------------------------------------|--------------------------------------------------------------------------------------------------------------------------------------------------------------------------------|------------------------------------------------------------------------------------------------------------------------------------------------------------------------------------------------------------------------------------------------------------------------------------------------------------------------------------------------------------------------------|-------------------|--|------------------|--|--------------------------------------|-------------------------------------------|
| Time frame: Since the initial planning of the work |                                                                                                                                                                                |                                                                                                                                                                                                                                                                                                                                                                              |                   |  |                  |  |                                      |                                           |
| <b>1</b>                                           | All support for the present manuscript (e.g., funding, provision of study materials, medical writing, article processing charges, etc.)<br><b>No time limit for this item.</b> | <input type="checkbox"/> <b>None</b><br><table border="1" style="width: 100%; border-collapse: collapse;"> <tr> <td style="width: 60%;">MicroVention Inc.</td> <td></td> </tr> <tr> <td>Terumo Co., Ltd.</td> <td></td> </tr> <tr> <td>Hyperion Medical Communications, LLC</td> <td style="font-size: small;">Click the tab key to add additional rows.</td> </tr> </table> | MicroVention Inc. |  | Terumo Co., Ltd. |  | Hyperion Medical Communications, LLC | Click the tab key to add additional rows. |
| MicroVention Inc.                                  |                                                                                                                                                                                |                                                                                                                                                                                                                                                                                                                                                                              |                   |  |                  |  |                                      |                                           |
| Terumo Co., Ltd.                                   |                                                                                                                                                                                |                                                                                                                                                                                                                                                                                                                                                                              |                   |  |                  |  |                                      |                                           |
| Hyperion Medical Communications, LLC               | Click the tab key to add additional rows.                                                                                                                                      |                                                                                                                                                                                                                                                                                                                                                                              |                   |  |                  |  |                                      |                                           |
| Time frame: past 36 months                         |                                                                                                                                                                                |                                                                                                                                                                                                                                                                                                                                                                              |                   |  |                  |  |                                      |                                           |
| <b>2</b>                                           | Grants or contracts from any entity (if not indicated in item #1 above).                                                                                                       | <input checked="" type="checkbox"/> <b>None</b><br><table border="1" style="width: 100%; border-collapse: collapse;"> <tr><td style="width: 60%; height: 20px;"></td><td></td></tr> <tr><td style="height: 20px;"></td><td></td></tr> <tr><td style="height: 20px;"></td><td></td></tr> </table>                                                                             |                   |  |                  |  |                                      |                                           |
|                                                    |                                                                                                                                                                                |                                                                                                                                                                                                                                                                                                                                                                              |                   |  |                  |  |                                      |                                           |
|                                                    |                                                                                                                                                                                |                                                                                                                                                                                                                                                                                                                                                                              |                   |  |                  |  |                                      |                                           |
|                                                    |                                                                                                                                                                                |                                                                                                                                                                                                                                                                                                                                                                              |                   |  |                  |  |                                      |                                           |

|           |                                                                                                              | Name all entities with whom you have this relationship or indicate none (add rows as needed)                                                                                                 | Specifications/Comments (e.g., if payments were made to you or to your institution) |  |  |  |  |  |  |
|-----------|--------------------------------------------------------------------------------------------------------------|----------------------------------------------------------------------------------------------------------------------------------------------------------------------------------------------|-------------------------------------------------------------------------------------|--|--|--|--|--|--|
| <b>3</b>  | Royalties or licenses                                                                                        | <input checked="" type="checkbox"/> <b>None</b><br><br><table border="1" style="width:100%;"><tr><td> </td><td> </td></tr><tr><td> </td><td> </td></tr><tr><td> </td><td> </td></tr></table> |                                                                                     |  |  |  |  |  |  |
|           |                                                                                                              |                                                                                                                                                                                              |                                                                                     |  |  |  |  |  |  |
|           |                                                                                                              |                                                                                                                                                                                              |                                                                                     |  |  |  |  |  |  |
|           |                                                                                                              |                                                                                                                                                                                              |                                                                                     |  |  |  |  |  |  |
| <b>4</b>  | Consulting fees                                                                                              | <input checked="" type="checkbox"/> <b>None</b><br><br><table border="1" style="width:100%;"><tr><td> </td><td> </td></tr><tr><td> </td><td> </td></tr><tr><td> </td><td> </td></tr></table> |                                                                                     |  |  |  |  |  |  |
|           |                                                                                                              |                                                                                                                                                                                              |                                                                                     |  |  |  |  |  |  |
|           |                                                                                                              |                                                                                                                                                                                              |                                                                                     |  |  |  |  |  |  |
|           |                                                                                                              |                                                                                                                                                                                              |                                                                                     |  |  |  |  |  |  |
| <b>5</b>  | Payment or honoraria for lectures, presentations, speakers bureaus, manuscript writing or educational events | <input checked="" type="checkbox"/> <b>None</b><br><br><table border="1" style="width:100%;"><tr><td> </td><td> </td></tr><tr><td> </td><td> </td></tr><tr><td> </td><td> </td></tr></table> |                                                                                     |  |  |  |  |  |  |
|           |                                                                                                              |                                                                                                                                                                                              |                                                                                     |  |  |  |  |  |  |
|           |                                                                                                              |                                                                                                                                                                                              |                                                                                     |  |  |  |  |  |  |
|           |                                                                                                              |                                                                                                                                                                                              |                                                                                     |  |  |  |  |  |  |
| <b>6</b>  | Payment for expert testimony                                                                                 | <input checked="" type="checkbox"/> <b>None</b><br><br><table border="1" style="width:100%;"><tr><td> </td><td> </td></tr><tr><td> </td><td> </td></tr><tr><td> </td><td> </td></tr></table> |                                                                                     |  |  |  |  |  |  |
|           |                                                                                                              |                                                                                                                                                                                              |                                                                                     |  |  |  |  |  |  |
|           |                                                                                                              |                                                                                                                                                                                              |                                                                                     |  |  |  |  |  |  |
|           |                                                                                                              |                                                                                                                                                                                              |                                                                                     |  |  |  |  |  |  |
| <b>7</b>  | Support for attending meetings and/or travel                                                                 | <input checked="" type="checkbox"/> <b>None</b><br><br><table border="1" style="width:100%;"><tr><td> </td><td> </td></tr><tr><td> </td><td> </td></tr><tr><td> </td><td> </td></tr></table> |                                                                                     |  |  |  |  |  |  |
|           |                                                                                                              |                                                                                                                                                                                              |                                                                                     |  |  |  |  |  |  |
|           |                                                                                                              |                                                                                                                                                                                              |                                                                                     |  |  |  |  |  |  |
|           |                                                                                                              |                                                                                                                                                                                              |                                                                                     |  |  |  |  |  |  |
| <b>8</b>  | Patents planned, issued or pending                                                                           | <input checked="" type="checkbox"/> <b>None</b><br><br><table border="1" style="width:100%;"><tr><td> </td><td> </td></tr><tr><td> </td><td> </td></tr><tr><td> </td><td> </td></tr></table> |                                                                                     |  |  |  |  |  |  |
|           |                                                                                                              |                                                                                                                                                                                              |                                                                                     |  |  |  |  |  |  |
|           |                                                                                                              |                                                                                                                                                                                              |                                                                                     |  |  |  |  |  |  |
|           |                                                                                                              |                                                                                                                                                                                              |                                                                                     |  |  |  |  |  |  |
| <b>9</b>  | Participation on a Data Safety Monitoring Board or Advisory Board                                            | <input checked="" type="checkbox"/> <b>None</b><br><br><table border="1" style="width:100%;"><tr><td> </td><td> </td></tr><tr><td> </td><td> </td></tr><tr><td> </td><td> </td></tr></table> |                                                                                     |  |  |  |  |  |  |
|           |                                                                                                              |                                                                                                                                                                                              |                                                                                     |  |  |  |  |  |  |
|           |                                                                                                              |                                                                                                                                                                                              |                                                                                     |  |  |  |  |  |  |
|           |                                                                                                              |                                                                                                                                                                                              |                                                                                     |  |  |  |  |  |  |
| <b>10</b> | Leadership or fiduciary role in other board,                                                                 | <input checked="" type="checkbox"/> <b>None</b><br><br><table border="1" style="width:100%;"><tr><td> </td><td> </td></tr></table>                                                           |                                                                                     |  |  |  |  |  |  |
|           |                                                                                                              |                                                                                                                                                                                              |                                                                                     |  |  |  |  |  |  |

|           |                                                                                  | Name all entities with whom you have this relationship or indicate none (add rows as needed)                                                                         | Specifications/Comments (e.g., if payments were made to you or to your institution) |  |  |  |                                                                                      |  |                                                                                                                   |  |  |  |  |  |  |
|-----------|----------------------------------------------------------------------------------|----------------------------------------------------------------------------------------------------------------------------------------------------------------------|-------------------------------------------------------------------------------------|--|--|--|--------------------------------------------------------------------------------------|--|-------------------------------------------------------------------------------------------------------------------|--|--|--|--|--|--|
|           | society, committee or advocacy group, paid or unpaid                             | <table border="1"><tr><td> </td><td> </td></tr><tr><td> </td><td> </td></tr></table>                                                                                 |                                                                                     |  |  |  | <table border="1"><tr><td> </td><td> </td></tr><tr><td> </td><td> </td></tr></table> |  |                                                                                                                   |  |  |  |  |  |  |
|           |                                                                                  |                                                                                                                                                                      |                                                                                     |  |  |  |                                                                                      |  |                                                                                                                   |  |  |  |  |  |  |
|           |                                                                                  |                                                                                                                                                                      |                                                                                     |  |  |  |                                                                                      |  |                                                                                                                   |  |  |  |  |  |  |
|           |                                                                                  |                                                                                                                                                                      |                                                                                     |  |  |  |                                                                                      |  |                                                                                                                   |  |  |  |  |  |  |
|           |                                                                                  |                                                                                                                                                                      |                                                                                     |  |  |  |                                                                                      |  |                                                                                                                   |  |  |  |  |  |  |
| <b>11</b> | Stock or stock options                                                           | <input checked="" type="checkbox"/> <b>None</b><br><table border="1"><tr><td> </td><td> </td></tr><tr><td> </td><td> </td></tr><tr><td> </td><td> </td></tr></table> |                                                                                     |  |  |  |                                                                                      |  | <table border="1"><tr><td> </td><td> </td></tr><tr><td> </td><td> </td></tr><tr><td> </td><td> </td></tr></table> |  |  |  |  |  |  |
|           |                                                                                  |                                                                                                                                                                      |                                                                                     |  |  |  |                                                                                      |  |                                                                                                                   |  |  |  |  |  |  |
|           |                                                                                  |                                                                                                                                                                      |                                                                                     |  |  |  |                                                                                      |  |                                                                                                                   |  |  |  |  |  |  |
|           |                                                                                  |                                                                                                                                                                      |                                                                                     |  |  |  |                                                                                      |  |                                                                                                                   |  |  |  |  |  |  |
|           |                                                                                  |                                                                                                                                                                      |                                                                                     |  |  |  |                                                                                      |  |                                                                                                                   |  |  |  |  |  |  |
|           |                                                                                  |                                                                                                                                                                      |                                                                                     |  |  |  |                                                                                      |  |                                                                                                                   |  |  |  |  |  |  |
|           |                                                                                  |                                                                                                                                                                      |                                                                                     |  |  |  |                                                                                      |  |                                                                                                                   |  |  |  |  |  |  |
| <b>12</b> | Receipt of equipment, materials, drugs, medical writing, gifts or other services | <input checked="" type="checkbox"/> <b>None</b><br><table border="1"><tr><td> </td><td> </td></tr><tr><td> </td><td> </td></tr><tr><td> </td><td> </td></tr></table> |                                                                                     |  |  |  |                                                                                      |  | <table border="1"><tr><td> </td><td> </td></tr><tr><td> </td><td> </td></tr><tr><td> </td><td> </td></tr></table> |  |  |  |  |  |  |
|           |                                                                                  |                                                                                                                                                                      |                                                                                     |  |  |  |                                                                                      |  |                                                                                                                   |  |  |  |  |  |  |
|           |                                                                                  |                                                                                                                                                                      |                                                                                     |  |  |  |                                                                                      |  |                                                                                                                   |  |  |  |  |  |  |
|           |                                                                                  |                                                                                                                                                                      |                                                                                     |  |  |  |                                                                                      |  |                                                                                                                   |  |  |  |  |  |  |
|           |                                                                                  |                                                                                                                                                                      |                                                                                     |  |  |  |                                                                                      |  |                                                                                                                   |  |  |  |  |  |  |
|           |                                                                                  |                                                                                                                                                                      |                                                                                     |  |  |  |                                                                                      |  |                                                                                                                   |  |  |  |  |  |  |
|           |                                                                                  |                                                                                                                                                                      |                                                                                     |  |  |  |                                                                                      |  |                                                                                                                   |  |  |  |  |  |  |
| <b>13</b> | Other financial or non-financial interests                                       | <input checked="" type="checkbox"/> <b>None</b><br><table border="1"><tr><td> </td><td> </td></tr><tr><td> </td><td> </td></tr><tr><td> </td><td> </td></tr></table> |                                                                                     |  |  |  |                                                                                      |  | <table border="1"><tr><td> </td><td> </td></tr><tr><td> </td><td> </td></tr><tr><td> </td><td> </td></tr></table> |  |  |  |  |  |  |
|           |                                                                                  |                                                                                                                                                                      |                                                                                     |  |  |  |                                                                                      |  |                                                                                                                   |  |  |  |  |  |  |
|           |                                                                                  |                                                                                                                                                                      |                                                                                     |  |  |  |                                                                                      |  |                                                                                                                   |  |  |  |  |  |  |
|           |                                                                                  |                                                                                                                                                                      |                                                                                     |  |  |  |                                                                                      |  |                                                                                                                   |  |  |  |  |  |  |
|           |                                                                                  |                                                                                                                                                                      |                                                                                     |  |  |  |                                                                                      |  |                                                                                                                   |  |  |  |  |  |  |
|           |                                                                                  |                                                                                                                                                                      |                                                                                     |  |  |  |                                                                                      |  |                                                                                                                   |  |  |  |  |  |  |
|           |                                                                                  |                                                                                                                                                                      |                                                                                     |  |  |  |                                                                                      |  |                                                                                                                   |  |  |  |  |  |  |

Please place an "X" next to the following statement to indicate your agreement:

I certify that I have answered every question and have not altered the wording of any of the questions on this form.

## ICMJE DISCLOSURE FORM

**Date:** 5/18/2022

**Your Name:** Hirohisa Kobayashi

**Manuscript Title:** POLY(2-METHOXYETHYL ACRYLATE) (PMEA) IMPROVES THROMBORESISTANCE OF FRED FLOW DIVERTERS: A THROMBOGENIC EVALUATION OF THE FLOW DIVERTERS WITH HUMAN BLOOD UNDER FLOW CONDITIONS

**Manuscript Number (if known):** [Click or tap here to enter text.](#)

In the interest of transparency, we ask you to disclose all relationships/activities/interests listed below that are related to the content of your manuscript. "Related" means any relation with for-profit or not-for-profit third parties whose interests may be affected by the content of the manuscript. Disclosure represents a commitment to transparency and does not necessarily indicate a bias. If you are in doubt about whether to list a relationship/activity/interest, it is preferable that you do so.

The author's relationships/activities/interests should be defined broadly. For example, if your manuscript pertains to the epidemiology of hypertension, you should declare all relationships with manufacturers of antihypertensive medication, even if that medication is not mentioned in the manuscript.

In item #1 below, report all support for the work reported in this manuscript without time limit. For all other items, the time frame for disclosure is the past 36 months.

|                                                    | Name all entities with whom you have this relationship or indicate none (add rows as needed)                                                                                   | Specifications/Comments (e.g., if payments were made to you or to your institution)                                                                                                                                                                                                                                                                                          |                   |  |                  |  |                                      |                                           |
|----------------------------------------------------|--------------------------------------------------------------------------------------------------------------------------------------------------------------------------------|------------------------------------------------------------------------------------------------------------------------------------------------------------------------------------------------------------------------------------------------------------------------------------------------------------------------------------------------------------------------------|-------------------|--|------------------|--|--------------------------------------|-------------------------------------------|
| Time frame: Since the initial planning of the work |                                                                                                                                                                                |                                                                                                                                                                                                                                                                                                                                                                              |                   |  |                  |  |                                      |                                           |
| <b>1</b>                                           | All support for the present manuscript (e.g., funding, provision of study materials, medical writing, article processing charges, etc.)<br><b>No time limit for this item.</b> | <input type="checkbox"/> <b>None</b><br><table border="1" style="width: 100%; border-collapse: collapse;"> <tr> <td style="width: 60%;">MicroVention Inc.</td> <td></td> </tr> <tr> <td>Terumo Co., Ltd.</td> <td></td> </tr> <tr> <td>Hyperion Medical Communications, LLC</td> <td style="font-size: small;">Click the tab key to add additional rows.</td> </tr> </table> | MicroVention Inc. |  | Terumo Co., Ltd. |  | Hyperion Medical Communications, LLC | Click the tab key to add additional rows. |
| MicroVention Inc.                                  |                                                                                                                                                                                |                                                                                                                                                                                                                                                                                                                                                                              |                   |  |                  |  |                                      |                                           |
| Terumo Co., Ltd.                                   |                                                                                                                                                                                |                                                                                                                                                                                                                                                                                                                                                                              |                   |  |                  |  |                                      |                                           |
| Hyperion Medical Communications, LLC               | Click the tab key to add additional rows.                                                                                                                                      |                                                                                                                                                                                                                                                                                                                                                                              |                   |  |                  |  |                                      |                                           |
| Time frame: past 36 months                         |                                                                                                                                                                                |                                                                                                                                                                                                                                                                                                                                                                              |                   |  |                  |  |                                      |                                           |
| <b>2</b>                                           | Grants or contracts from any entity (if not indicated in item #1 above).                                                                                                       | <input checked="" type="checkbox"/> <b>None</b><br><table border="1" style="width: 100%; border-collapse: collapse;"> <tr><td style="width: 60%; height: 20px;"></td><td></td></tr> <tr><td style="height: 20px;"></td><td></td></tr> <tr><td style="height: 20px;"></td><td></td></tr> </table>                                                                             |                   |  |                  |  |                                      |                                           |
|                                                    |                                                                                                                                                                                |                                                                                                                                                                                                                                                                                                                                                                              |                   |  |                  |  |                                      |                                           |
|                                                    |                                                                                                                                                                                |                                                                                                                                                                                                                                                                                                                                                                              |                   |  |                  |  |                                      |                                           |
|                                                    |                                                                                                                                                                                |                                                                                                                                                                                                                                                                                                                                                                              |                   |  |                  |  |                                      |                                           |

|           |                                                                                                              | Name all entities with whom you have this relationship or indicate none (add rows as needed)                                                                                                 | Specifications/Comments (e.g., if payments were made to you or to your institution) |  |  |  |  |  |  |
|-----------|--------------------------------------------------------------------------------------------------------------|----------------------------------------------------------------------------------------------------------------------------------------------------------------------------------------------|-------------------------------------------------------------------------------------|--|--|--|--|--|--|
| <b>3</b>  | Royalties or licenses                                                                                        | <input checked="" type="checkbox"/> <b>None</b><br><br><table border="1" style="width:100%;"><tr><td> </td><td> </td></tr><tr><td> </td><td> </td></tr><tr><td> </td><td> </td></tr></table> |                                                                                     |  |  |  |  |  |  |
|           |                                                                                                              |                                                                                                                                                                                              |                                                                                     |  |  |  |  |  |  |
|           |                                                                                                              |                                                                                                                                                                                              |                                                                                     |  |  |  |  |  |  |
|           |                                                                                                              |                                                                                                                                                                                              |                                                                                     |  |  |  |  |  |  |
| <b>4</b>  | Consulting fees                                                                                              | <input checked="" type="checkbox"/> <b>None</b><br><br><table border="1" style="width:100%;"><tr><td> </td><td> </td></tr><tr><td> </td><td> </td></tr><tr><td> </td><td> </td></tr></table> |                                                                                     |  |  |  |  |  |  |
|           |                                                                                                              |                                                                                                                                                                                              |                                                                                     |  |  |  |  |  |  |
|           |                                                                                                              |                                                                                                                                                                                              |                                                                                     |  |  |  |  |  |  |
|           |                                                                                                              |                                                                                                                                                                                              |                                                                                     |  |  |  |  |  |  |
| <b>5</b>  | Payment or honoraria for lectures, presentations, speakers bureaus, manuscript writing or educational events | <input checked="" type="checkbox"/> <b>None</b><br><br><table border="1" style="width:100%;"><tr><td> </td><td> </td></tr><tr><td> </td><td> </td></tr><tr><td> </td><td> </td></tr></table> |                                                                                     |  |  |  |  |  |  |
|           |                                                                                                              |                                                                                                                                                                                              |                                                                                     |  |  |  |  |  |  |
|           |                                                                                                              |                                                                                                                                                                                              |                                                                                     |  |  |  |  |  |  |
|           |                                                                                                              |                                                                                                                                                                                              |                                                                                     |  |  |  |  |  |  |
| <b>6</b>  | Payment for expert testimony                                                                                 | <input checked="" type="checkbox"/> <b>None</b><br><br><table border="1" style="width:100%;"><tr><td> </td><td> </td></tr><tr><td> </td><td> </td></tr><tr><td> </td><td> </td></tr></table> |                                                                                     |  |  |  |  |  |  |
|           |                                                                                                              |                                                                                                                                                                                              |                                                                                     |  |  |  |  |  |  |
|           |                                                                                                              |                                                                                                                                                                                              |                                                                                     |  |  |  |  |  |  |
|           |                                                                                                              |                                                                                                                                                                                              |                                                                                     |  |  |  |  |  |  |
| <b>7</b>  | Support for attending meetings and/or travel                                                                 | <input checked="" type="checkbox"/> <b>None</b><br><br><table border="1" style="width:100%;"><tr><td> </td><td> </td></tr><tr><td> </td><td> </td></tr><tr><td> </td><td> </td></tr></table> |                                                                                     |  |  |  |  |  |  |
|           |                                                                                                              |                                                                                                                                                                                              |                                                                                     |  |  |  |  |  |  |
|           |                                                                                                              |                                                                                                                                                                                              |                                                                                     |  |  |  |  |  |  |
|           |                                                                                                              |                                                                                                                                                                                              |                                                                                     |  |  |  |  |  |  |
| <b>8</b>  | Patents planned, issued or pending                                                                           | <input checked="" type="checkbox"/> <b>None</b><br><br><table border="1" style="width:100%;"><tr><td> </td><td> </td></tr><tr><td> </td><td> </td></tr><tr><td> </td><td> </td></tr></table> |                                                                                     |  |  |  |  |  |  |
|           |                                                                                                              |                                                                                                                                                                                              |                                                                                     |  |  |  |  |  |  |
|           |                                                                                                              |                                                                                                                                                                                              |                                                                                     |  |  |  |  |  |  |
|           |                                                                                                              |                                                                                                                                                                                              |                                                                                     |  |  |  |  |  |  |
| <b>9</b>  | Participation on a Data Safety Monitoring Board or Advisory Board                                            | <input checked="" type="checkbox"/> <b>None</b><br><br><table border="1" style="width:100%;"><tr><td> </td><td> </td></tr><tr><td> </td><td> </td></tr><tr><td> </td><td> </td></tr></table> |                                                                                     |  |  |  |  |  |  |
|           |                                                                                                              |                                                                                                                                                                                              |                                                                                     |  |  |  |  |  |  |
|           |                                                                                                              |                                                                                                                                                                                              |                                                                                     |  |  |  |  |  |  |
|           |                                                                                                              |                                                                                                                                                                                              |                                                                                     |  |  |  |  |  |  |
| <b>10</b> | Leadership or fiduciary role in other board,                                                                 | <input checked="" type="checkbox"/> <b>None</b><br><br><table border="1" style="width:100%;"><tr><td> </td><td> </td></tr></table>                                                           |                                                                                     |  |  |  |  |  |  |
|           |                                                                                                              |                                                                                                                                                                                              |                                                                                     |  |  |  |  |  |  |

|           |                                                                                  | Name all entities with whom you have this relationship or indicate none (add rows as needed) | Specifications/Comments (e.g., if payments were made to you or to your institution) |
|-----------|----------------------------------------------------------------------------------|----------------------------------------------------------------------------------------------|-------------------------------------------------------------------------------------|
|           | society, committee or advocacy group, paid or unpaid                             |                                                                                              |                                                                                     |
| <b>11</b> | Stock or stock options                                                           | <input checked="" type="checkbox"/> <b>None</b>                                              |                                                                                     |
|           |                                                                                  |                                                                                              |                                                                                     |
|           |                                                                                  |                                                                                              |                                                                                     |
| <b>12</b> | Receipt of equipment, materials, drugs, medical writing, gifts or other services | <input checked="" type="checkbox"/> <b>None</b>                                              |                                                                                     |
|           |                                                                                  |                                                                                              |                                                                                     |
|           |                                                                                  |                                                                                              |                                                                                     |
| <b>13</b> | Other financial or non-financial interests                                       | <input checked="" type="checkbox"/> <b>None</b>                                              |                                                                                     |
|           |                                                                                  |                                                                                              |                                                                                     |
|           |                                                                                  |                                                                                              |                                                                                     |

**Please place an "X" next to the following statement to indicate your agreement:**

I certify that I have answered every question and have not altered the wording of any of the questions on this form.

## ICMJE DISCLOSURE FORM

**Date:** 5/18/2022

**Your Name:** John Belletto

**Manuscript Title:** POLY(2-METHOXYETHYL ACRYLATE) (PMEA) IMPROVES THROMBORESISTANCE OF FRED FLOW DIVERTERS: A THROMBOGENIC EVALUATION OF THE FLOW DIVERTERS WITH HUMAN BLOOD UNDER FLOW CONDITIONS

**Manuscript Number (if known):** [Click or tap here to enter text.](#)

In the interest of transparency, we ask you to disclose all relationships/activities/interests listed below that are related to the content of your manuscript. "Related" means any relation with for-profit or not-for-profit third parties whose interests may be affected by the content of the manuscript. Disclosure represents a commitment to transparency and does not necessarily indicate a bias. If you are in doubt about whether to list a relationship/activity/interest, it is preferable that you do so.

The author's relationships/activities/interests should be defined broadly. For example, if your manuscript pertains to the epidemiology of hypertension, you should declare all relationships with manufacturers of antihypertensive medication, even if that medication is not mentioned in the manuscript.

In item #1 below, report all support for the work reported in this manuscript without time limit. For all other items, the time frame for disclosure is the past 36 months.

|                                                           | Name all entities with whom you have this relationship or indicate none (add rows as needed)                                                                                   | Specifications/Comments (e.g., if payments were made to you or to your institution)                                                                                                                                                                                                                                                                               |                   |  |                  |  |                                      |                                                          |
|-----------------------------------------------------------|--------------------------------------------------------------------------------------------------------------------------------------------------------------------------------|-------------------------------------------------------------------------------------------------------------------------------------------------------------------------------------------------------------------------------------------------------------------------------------------------------------------------------------------------------------------|-------------------|--|------------------|--|--------------------------------------|----------------------------------------------------------|
| <b>Time frame: Since the initial planning of the work</b> |                                                                                                                                                                                |                                                                                                                                                                                                                                                                                                                                                                   |                   |  |                  |  |                                      |                                                          |
| <b>1</b>                                                  | All support for the present manuscript (e.g., funding, provision of study materials, medical writing, article processing charges, etc.)<br><b>No time limit for this item.</b> | <input type="checkbox"/> <b>None</b><br><table border="1" style="width: 100%; border-collapse: collapse;"> <tr> <td style="width: 60%;">MicroVention Inc.</td> <td></td> </tr> <tr> <td>Terumo Co., Ltd.</td> <td></td> </tr> <tr> <td>Hyperion Medical Communications, LLC</td> <td><small>Click the tab key to add additional rows.</small></td> </tr> </table> | MicroVention Inc. |  | Terumo Co., Ltd. |  | Hyperion Medical Communications, LLC | <small>Click the tab key to add additional rows.</small> |
| MicroVention Inc.                                         |                                                                                                                                                                                |                                                                                                                                                                                                                                                                                                                                                                   |                   |  |                  |  |                                      |                                                          |
| Terumo Co., Ltd.                                          |                                                                                                                                                                                |                                                                                                                                                                                                                                                                                                                                                                   |                   |  |                  |  |                                      |                                                          |
| Hyperion Medical Communications, LLC                      | <small>Click the tab key to add additional rows.</small>                                                                                                                       |                                                                                                                                                                                                                                                                                                                                                                   |                   |  |                  |  |                                      |                                                          |
| <b>Time frame: past 36 months</b>                         |                                                                                                                                                                                |                                                                                                                                                                                                                                                                                                                                                                   |                   |  |                  |  |                                      |                                                          |
| <b>2</b>                                                  | Grants or contracts from any entity (if not indicated in item #1 above).                                                                                                       | <input checked="" type="checkbox"/> <b>None</b><br><table border="1" style="width: 100%; border-collapse: collapse;"> <tr><td style="width: 60%; height: 20px;"></td><td></td></tr> <tr><td style="height: 20px;"></td><td></td></tr> <tr><td style="height: 20px;"></td><td></td></tr> </table>                                                                  |                   |  |                  |  |                                      |                                                          |
|                                                           |                                                                                                                                                                                |                                                                                                                                                                                                                                                                                                                                                                   |                   |  |                  |  |                                      |                                                          |
|                                                           |                                                                                                                                                                                |                                                                                                                                                                                                                                                                                                                                                                   |                   |  |                  |  |                                      |                                                          |
|                                                           |                                                                                                                                                                                |                                                                                                                                                                                                                                                                                                                                                                   |                   |  |                  |  |                                      |                                                          |

|           |                                                                                                              | Name all entities with whom you have this relationship or indicate none (add rows as needed) | Specifications/Comments (e.g., if payments were made to you or to your institution) |
|-----------|--------------------------------------------------------------------------------------------------------------|----------------------------------------------------------------------------------------------|-------------------------------------------------------------------------------------|
| <b>3</b>  | Royalties or licenses                                                                                        | <input checked="" type="checkbox"/> <b>None</b>                                              |                                                                                     |
|           |                                                                                                              |                                                                                              |                                                                                     |
|           |                                                                                                              |                                                                                              |                                                                                     |
| <b>4</b>  | Consulting fees                                                                                              | <input checked="" type="checkbox"/> <b>None</b>                                              |                                                                                     |
|           |                                                                                                              |                                                                                              |                                                                                     |
|           |                                                                                                              |                                                                                              |                                                                                     |
| <b>5</b>  | Payment or honoraria for lectures, presentations, speakers bureaus, manuscript writing or educational events | <input checked="" type="checkbox"/> <b>None</b>                                              |                                                                                     |
|           |                                                                                                              |                                                                                              |                                                                                     |
|           |                                                                                                              |                                                                                              |                                                                                     |
| <b>6</b>  | Payment for expert testimony                                                                                 | <input checked="" type="checkbox"/> <b>None</b>                                              |                                                                                     |
|           |                                                                                                              |                                                                                              |                                                                                     |
|           |                                                                                                              |                                                                                              |                                                                                     |
| <b>7</b>  | Support for attending meetings and/or travel                                                                 | <input checked="" type="checkbox"/> <b>None</b>                                              |                                                                                     |
|           |                                                                                                              |                                                                                              |                                                                                     |
|           |                                                                                                              |                                                                                              |                                                                                     |
| <b>8</b>  | Patents planned, issued or pending                                                                           | <input checked="" type="checkbox"/> <b>None</b>                                              |                                                                                     |
|           |                                                                                                              |                                                                                              |                                                                                     |
|           |                                                                                                              |                                                                                              |                                                                                     |
| <b>9</b>  | Participation on a Data Safety Monitoring Board or Advisory Board                                            | <input checked="" type="checkbox"/> <b>None</b>                                              |                                                                                     |
|           |                                                                                                              |                                                                                              |                                                                                     |
|           |                                                                                                              |                                                                                              |                                                                                     |
| <b>10</b> | Leadership or fiduciary role in other board,                                                                 | <input checked="" type="checkbox"/> <b>None</b>                                              |                                                                                     |
|           |                                                                                                              |                                                                                              |                                                                                     |

|                                                                                                                                                                                                                                                               |                                                                                  | Name all entities with whom you have this relationship or indicate none (add rows as needed) | Specifications/Comments (e.g., if payments were made to you or to your institution) |
|---------------------------------------------------------------------------------------------------------------------------------------------------------------------------------------------------------------------------------------------------------------|----------------------------------------------------------------------------------|----------------------------------------------------------------------------------------------|-------------------------------------------------------------------------------------|
|                                                                                                                                                                                                                                                               | society, committee or advocacy group, paid or unpaid                             |                                                                                              |                                                                                     |
| <b>11</b>                                                                                                                                                                                                                                                     | Stock or stock options                                                           | <input checked="" type="checkbox"/> <b>None</b>                                              |                                                                                     |
|                                                                                                                                                                                                                                                               |                                                                                  |                                                                                              |                                                                                     |
|                                                                                                                                                                                                                                                               |                                                                                  |                                                                                              |                                                                                     |
| <b>12</b>                                                                                                                                                                                                                                                     | Receipt of equipment, materials, drugs, medical writing, gifts or other services | <input checked="" type="checkbox"/> <b>None</b>                                              |                                                                                     |
|                                                                                                                                                                                                                                                               |                                                                                  |                                                                                              |                                                                                     |
|                                                                                                                                                                                                                                                               |                                                                                  |                                                                                              |                                                                                     |
| <b>13</b>                                                                                                                                                                                                                                                     | Other financial or non-financial interests                                       | <input checked="" type="checkbox"/> <b>None</b>                                              |                                                                                     |
|                                                                                                                                                                                                                                                               |                                                                                  |                                                                                              |                                                                                     |
|                                                                                                                                                                                                                                                               |                                                                                  |                                                                                              |                                                                                     |
| <p><b>Please place an "X" next to the following statement to indicate your agreement:</b></p> <p><input checked="" type="checkbox"/> I certify that I have answered every question and have not altered the wording of any of the questions on this form.</p> |                                                                                  |                                                                                              |                                                                                     |

## ICMJE DISCLOSURE FORM

**Date:** 5/18/2022

**Your Name:** Keiko Yoshizawa

**Manuscript Title:** POLY(2-METHOXYETHYL ACRYLATE) (PMEA) IMPROVES THROMBORESISTANCE OF FRED FLOW DIVERTERS: A THROMBOGENIC EVALUATION OF THE FLOW DIVERTERS WITH HUMAN BLOOD UNDER FLOW CONDITIONS

**Manuscript Number (if known):** [Click or tap here to enter text.](#)

In the interest of transparency, we ask you to disclose all relationships/activities/interests listed below that are related to the content of your manuscript. "Related" means any relation with for-profit or not-for-profit third parties whose interests may be affected by the content of the manuscript. Disclosure represents a commitment to transparency and does not necessarily indicate a bias. If you are in doubt about whether to list a relationship/activity/interest, it is preferable that you do so.

The author's relationships/activities/interests should be defined broadly. For example, if your manuscript pertains to the epidemiology of hypertension, you should declare all relationships with manufacturers of antihypertensive medication, even if that medication is not mentioned in the manuscript.

In item #1 below, report all support for the work reported in this manuscript without time limit. For all other items, the time frame for disclosure is the past 36 months.

|                                                    | Name all entities with whom you have this relationship or indicate none (add rows as needed)                                                                                   | Specifications/Comments (e.g., if payments were made to you or to your institution)                                                                                                                                                                                                                                                                                          |                   |  |                  |  |                                      |                                           |
|----------------------------------------------------|--------------------------------------------------------------------------------------------------------------------------------------------------------------------------------|------------------------------------------------------------------------------------------------------------------------------------------------------------------------------------------------------------------------------------------------------------------------------------------------------------------------------------------------------------------------------|-------------------|--|------------------|--|--------------------------------------|-------------------------------------------|
| Time frame: Since the initial planning of the work |                                                                                                                                                                                |                                                                                                                                                                                                                                                                                                                                                                              |                   |  |                  |  |                                      |                                           |
| <b>1</b>                                           | All support for the present manuscript (e.g., funding, provision of study materials, medical writing, article processing charges, etc.)<br><b>No time limit for this item.</b> | <input type="checkbox"/> <b>None</b><br><table border="1" style="width: 100%; border-collapse: collapse;"> <tr> <td style="width: 60%;">MicroVention Inc.</td> <td></td> </tr> <tr> <td>Terumo Co., Ltd.</td> <td></td> </tr> <tr> <td>Hyperion Medical Communications, LLC</td> <td style="font-size: small;">Click the tab key to add additional rows.</td> </tr> </table> | MicroVention Inc. |  | Terumo Co., Ltd. |  | Hyperion Medical Communications, LLC | Click the tab key to add additional rows. |
| MicroVention Inc.                                  |                                                                                                                                                                                |                                                                                                                                                                                                                                                                                                                                                                              |                   |  |                  |  |                                      |                                           |
| Terumo Co., Ltd.                                   |                                                                                                                                                                                |                                                                                                                                                                                                                                                                                                                                                                              |                   |  |                  |  |                                      |                                           |
| Hyperion Medical Communications, LLC               | Click the tab key to add additional rows.                                                                                                                                      |                                                                                                                                                                                                                                                                                                                                                                              |                   |  |                  |  |                                      |                                           |
| Time frame: past 36 months                         |                                                                                                                                                                                |                                                                                                                                                                                                                                                                                                                                                                              |                   |  |                  |  |                                      |                                           |
| <b>2</b>                                           | Grants or contracts from any entity (if not indicated in item #1 above).                                                                                                       | <input checked="" type="checkbox"/> <b>None</b><br><table border="1" style="width: 100%; border-collapse: collapse;"> <tr><td style="width: 60%; height: 20px;"></td><td></td></tr> <tr><td style="height: 20px;"></td><td></td></tr> <tr><td style="height: 20px;"></td><td></td></tr> </table>                                                                             |                   |  |                  |  |                                      |                                           |
|                                                    |                                                                                                                                                                                |                                                                                                                                                                                                                                                                                                                                                                              |                   |  |                  |  |                                      |                                           |
|                                                    |                                                                                                                                                                                |                                                                                                                                                                                                                                                                                                                                                                              |                   |  |                  |  |                                      |                                           |
|                                                    |                                                                                                                                                                                |                                                                                                                                                                                                                                                                                                                                                                              |                   |  |                  |  |                                      |                                           |

|    |                                                                                                              | Name all entities with whom you have this relationship or indicate none (add rows as needed)                                                                                                                                                                                   | Specifications/Comments (e.g., if payments were made to you or to your institution) |  |  |  |  |
|----|--------------------------------------------------------------------------------------------------------------|--------------------------------------------------------------------------------------------------------------------------------------------------------------------------------------------------------------------------------------------------------------------------------|-------------------------------------------------------------------------------------|--|--|--|--|
| 3  | Royalties or licenses                                                                                        | <input checked="" type="checkbox"/> <b>None</b><br><table border="1" style="width: 100%; height: 30px; margin-top: 5px;"> <tr><td> </td><td> </td></tr> </table> <table border="1" style="width: 100%; height: 30px; margin-top: 5px;"> <tr><td> </td><td> </td></tr> </table> |                                                                                     |  |  |  |  |
|    |                                                                                                              |                                                                                                                                                                                                                                                                                |                                                                                     |  |  |  |  |
|    |                                                                                                              |                                                                                                                                                                                                                                                                                |                                                                                     |  |  |  |  |
| 4  | Consulting fees                                                                                              | <input checked="" type="checkbox"/> <b>None</b><br><table border="1" style="width: 100%; height: 30px; margin-top: 5px;"> <tr><td> </td><td> </td></tr> </table> <table border="1" style="width: 100%; height: 30px; margin-top: 5px;"> <tr><td> </td><td> </td></tr> </table> |                                                                                     |  |  |  |  |
|    |                                                                                                              |                                                                                                                                                                                                                                                                                |                                                                                     |  |  |  |  |
|    |                                                                                                              |                                                                                                                                                                                                                                                                                |                                                                                     |  |  |  |  |
| 5  | Payment or honoraria for lectures, presentations, speakers bureaus, manuscript writing or educational events | <input checked="" type="checkbox"/> <b>None</b><br><table border="1" style="width: 100%; height: 30px; margin-top: 5px;"> <tr><td> </td><td> </td></tr> </table> <table border="1" style="width: 100%; height: 30px; margin-top: 5px;"> <tr><td> </td><td> </td></tr> </table> |                                                                                     |  |  |  |  |
|    |                                                                                                              |                                                                                                                                                                                                                                                                                |                                                                                     |  |  |  |  |
|    |                                                                                                              |                                                                                                                                                                                                                                                                                |                                                                                     |  |  |  |  |
| 6  | Payment for expert testimony                                                                                 | <input checked="" type="checkbox"/> <b>None</b><br><table border="1" style="width: 100%; height: 30px; margin-top: 5px;"> <tr><td> </td><td> </td></tr> </table> <table border="1" style="width: 100%; height: 30px; margin-top: 5px;"> <tr><td> </td><td> </td></tr> </table> |                                                                                     |  |  |  |  |
|    |                                                                                                              |                                                                                                                                                                                                                                                                                |                                                                                     |  |  |  |  |
|    |                                                                                                              |                                                                                                                                                                                                                                                                                |                                                                                     |  |  |  |  |
| 7  | Support for attending meetings and/or travel                                                                 | <input checked="" type="checkbox"/> <b>None</b><br><table border="1" style="width: 100%; height: 30px; margin-top: 5px;"> <tr><td> </td><td> </td></tr> </table> <table border="1" style="width: 100%; height: 30px; margin-top: 5px;"> <tr><td> </td><td> </td></tr> </table> |                                                                                     |  |  |  |  |
|    |                                                                                                              |                                                                                                                                                                                                                                                                                |                                                                                     |  |  |  |  |
|    |                                                                                                              |                                                                                                                                                                                                                                                                                |                                                                                     |  |  |  |  |
| 8  | Patents planned, issued or pending                                                                           | <input checked="" type="checkbox"/> <b>None</b><br><table border="1" style="width: 100%; height: 30px; margin-top: 5px;"> <tr><td> </td><td> </td></tr> </table> <table border="1" style="width: 100%; height: 30px; margin-top: 5px;"> <tr><td> </td><td> </td></tr> </table> |                                                                                     |  |  |  |  |
|    |                                                                                                              |                                                                                                                                                                                                                                                                                |                                                                                     |  |  |  |  |
|    |                                                                                                              |                                                                                                                                                                                                                                                                                |                                                                                     |  |  |  |  |
| 9  | Participation on a Data Safety Monitoring Board or Advisory Board                                            | <input checked="" type="checkbox"/> <b>None</b><br><table border="1" style="width: 100%; height: 30px; margin-top: 5px;"> <tr><td> </td><td> </td></tr> </table> <table border="1" style="width: 100%; height: 30px; margin-top: 5px;"> <tr><td> </td><td> </td></tr> </table> |                                                                                     |  |  |  |  |
|    |                                                                                                              |                                                                                                                                                                                                                                                                                |                                                                                     |  |  |  |  |
|    |                                                                                                              |                                                                                                                                                                                                                                                                                |                                                                                     |  |  |  |  |
| 10 | Leadership or fiduciary role in other board,                                                                 | <input checked="" type="checkbox"/> <b>None</b><br><table border="1" style="width: 100%; height: 30px; margin-top: 5px;"> <tr><td> </td><td> </td></tr> </table>                                                                                                               |                                                                                     |  |  |  |  |
|    |                                                                                                              |                                                                                                                                                                                                                                                                                |                                                                                     |  |  |  |  |

|           |                                                                                  | Name all entities with whom you have this relationship or indicate none (add rows as needed) | Specifications/Comments (e.g., if payments were made to you or to your institution) |
|-----------|----------------------------------------------------------------------------------|----------------------------------------------------------------------------------------------|-------------------------------------------------------------------------------------|
|           | society, committee or advocacy group, paid or unpaid                             | <input type="text"/>                                                                         | <input type="text"/>                                                                |
| <b>11</b> | Stock or stock options                                                           | <input checked="" type="checkbox"/> <b>None</b>                                              |                                                                                     |
|           |                                                                                  | <input type="text"/>                                                                         | <input type="text"/>                                                                |
|           |                                                                                  | <input type="text"/>                                                                         | <input type="text"/>                                                                |
| <b>12</b> | Receipt of equipment, materials, drugs, medical writing, gifts or other services | <input checked="" type="checkbox"/> <b>None</b>                                              |                                                                                     |
|           |                                                                                  | <input type="text"/>                                                                         | <input type="text"/>                                                                |
|           |                                                                                  | <input type="text"/>                                                                         | <input type="text"/>                                                                |
| <b>13</b> | Other financial or non-financial interests                                       | <input checked="" type="checkbox"/> <b>None</b>                                              |                                                                                     |
|           |                                                                                  | <input type="text"/>                                                                         | <input type="text"/>                                                                |
|           |                                                                                  | <input type="text"/>                                                                         | <input type="text"/>                                                                |

Please place an "X" next to the following statement to indicate your agreement:

I certify that I have answered every question and have not altered the wording of any of the questions on this form.

## ICMJE DISCLOSURE FORM

**Date:** 5/18/2022

**Your Name:** Mika Takenouchi

**Manuscript Title:** POLY(2-METHOXYETHYL ACRYLATE) (PMEA) IMPROVES THROMBORESISTANCE OF FRED FLOW DIVERTERS: A THROMBOGENIC EVALUATION OF THE FLOW DIVERTERS WITH HUMAN BLOOD UNDER FLOW CONDITIONS

**Manuscript Number (if known):** [Click or tap here to enter text.](#)

In the interest of transparency, we ask you to disclose all relationships/activities/interests listed below that are related to the content of your manuscript. "Related" means any relation with for-profit or not-for-profit third parties whose interests may be affected by the content of the manuscript. Disclosure represents a commitment to transparency and does not necessarily indicate a bias. If you are in doubt about whether to list a relationship/activity/interest, it is preferable that you do so.

The author's relationships/activities/interests should be defined broadly. For example, if your manuscript pertains to the epidemiology of hypertension, you should declare all relationships with manufacturers of antihypertensive medication, even if that medication is not mentioned in the manuscript.

In item #1 below, report all support for the work reported in this manuscript without time limit. For all other items, the time frame for disclosure is the past 36 months.

|                                                           |                                                                                                                                                                                | Name all entities with whom you have this relationship or indicate none (add rows as needed)                                                                                                                                                                                                                                                                                 | Specifications/Comments (e.g., if payments were made to you or to your institution) |  |                  |  |                                      |                                           |  |
|-----------------------------------------------------------|--------------------------------------------------------------------------------------------------------------------------------------------------------------------------------|------------------------------------------------------------------------------------------------------------------------------------------------------------------------------------------------------------------------------------------------------------------------------------------------------------------------------------------------------------------------------|-------------------------------------------------------------------------------------|--|------------------|--|--------------------------------------|-------------------------------------------|--|
| <b>Time frame: Since the initial planning of the work</b> |                                                                                                                                                                                |                                                                                                                                                                                                                                                                                                                                                                              |                                                                                     |  |                  |  |                                      |                                           |  |
| <b>1</b>                                                  | All support for the present manuscript (e.g., funding, provision of study materials, medical writing, article processing charges, etc.)<br><b>No time limit for this item.</b> | <input type="checkbox"/> <b>None</b><br><table border="1" style="width: 100%; border-collapse: collapse;"> <tr> <td style="width: 70%;">MicroVention Inc.</td> <td></td> </tr> <tr> <td>Terumo Co., Ltd.</td> <td></td> </tr> <tr> <td>Hyperion Medical Communications, LLC</td> <td style="font-size: small;">Click the tab key to add additional rows.</td> </tr> </table> | MicroVention Inc.                                                                   |  | Terumo Co., Ltd. |  | Hyperion Medical Communications, LLC | Click the tab key to add additional rows. |  |
| MicroVention Inc.                                         |                                                                                                                                                                                |                                                                                                                                                                                                                                                                                                                                                                              |                                                                                     |  |                  |  |                                      |                                           |  |
| Terumo Co., Ltd.                                          |                                                                                                                                                                                |                                                                                                                                                                                                                                                                                                                                                                              |                                                                                     |  |                  |  |                                      |                                           |  |
| Hyperion Medical Communications, LLC                      | Click the tab key to add additional rows.                                                                                                                                      |                                                                                                                                                                                                                                                                                                                                                                              |                                                                                     |  |                  |  |                                      |                                           |  |
| <b>Time frame: past 36 months</b>                         |                                                                                                                                                                                |                                                                                                                                                                                                                                                                                                                                                                              |                                                                                     |  |                  |  |                                      |                                           |  |
| <b>2</b>                                                  | Grants or contracts from any entity (if not indicated in item #1 above).                                                                                                       | <input checked="" type="checkbox"/> <b>None</b><br><table border="1" style="width: 100%; border-collapse: collapse;"> <tr><td style="width: 70%; height: 20px;"></td><td></td></tr> <tr><td style="height: 20px;"></td><td></td></tr> <tr><td style="height: 20px;"></td><td></td></tr> </table>                                                                             |                                                                                     |  |                  |  |                                      |                                           |  |
|                                                           |                                                                                                                                                                                |                                                                                                                                                                                                                                                                                                                                                                              |                                                                                     |  |                  |  |                                      |                                           |  |
|                                                           |                                                                                                                                                                                |                                                                                                                                                                                                                                                                                                                                                                              |                                                                                     |  |                  |  |                                      |                                           |  |
|                                                           |                                                                                                                                                                                |                                                                                                                                                                                                                                                                                                                                                                              |                                                                                     |  |                  |  |                                      |                                           |  |

|           |                                                                                                              | Name all entities with whom you have this relationship or indicate none (add rows as needed) | Specifications/Comments (e.g., if payments were made to you or to your institution) |
|-----------|--------------------------------------------------------------------------------------------------------------|----------------------------------------------------------------------------------------------|-------------------------------------------------------------------------------------|
| <b>3</b>  | Royalties or licenses                                                                                        | <input checked="" type="checkbox"/> <b>None</b><br><br><br>                                  |                                                                                     |
| <b>4</b>  | Consulting fees                                                                                              | <input checked="" type="checkbox"/> <b>None</b><br><br><br>                                  |                                                                                     |
| <b>5</b>  | Payment or honoraria for lectures, presentations, speakers bureaus, manuscript writing or educational events | <input checked="" type="checkbox"/> <b>None</b><br><br><br>                                  |                                                                                     |
| <b>6</b>  | Payment for expert testimony                                                                                 | <input checked="" type="checkbox"/> <b>None</b><br><br><br>                                  |                                                                                     |
| <b>7</b>  | Support for attending meetings and/or travel                                                                 | <input checked="" type="checkbox"/> <b>None</b><br><br><br>                                  |                                                                                     |
| <b>8</b>  | Patents planned, issued or pending                                                                           | <input checked="" type="checkbox"/> <b>None</b><br><br><br>                                  |                                                                                     |
| <b>9</b>  | Participation on a Data Safety Monitoring Board or Advisory Board                                            | <input checked="" type="checkbox"/> <b>None</b><br><br><br>                                  |                                                                                     |
| <b>10</b> | Leadership or fiduciary role in other board,                                                                 | <input checked="" type="checkbox"/> <b>None</b><br><br>                                      |                                                                                     |

|           |                                                                                  | Name all entities with whom you have this relationship or indicate none (add rows as needed) | Specifications/Comments (e.g., if payments were made to you or to your institution) |
|-----------|----------------------------------------------------------------------------------|----------------------------------------------------------------------------------------------|-------------------------------------------------------------------------------------|
|           | society, committee or advocacy group, paid or unpaid                             | <input type="text"/>                                                                         | <input type="text"/>                                                                |
| <b>11</b> | Stock or stock options                                                           | <input checked="" type="checkbox"/> <b>None</b>                                              |                                                                                     |
|           |                                                                                  | <input type="text"/>                                                                         | <input type="text"/>                                                                |
|           |                                                                                  | <input type="text"/>                                                                         | <input type="text"/>                                                                |
| <b>12</b> | Receipt of equipment, materials, drugs, medical writing, gifts or other services | <input checked="" type="checkbox"/> <b>None</b>                                              |                                                                                     |
|           |                                                                                  | <input type="text"/>                                                                         | <input type="text"/>                                                                |
|           |                                                                                  | <input type="text"/>                                                                         | <input type="text"/>                                                                |
| <b>13</b> | Other financial or non-financial interests                                       | <input checked="" type="checkbox"/> <b>None</b>                                              |                                                                                     |
|           |                                                                                  | <input type="text"/>                                                                         | <input type="text"/>                                                                |
|           |                                                                                  | <input type="text"/>                                                                         | <input type="text"/>                                                                |

Please place an "X" next to the following statement to indicate your agreement:

I certify that I have answered every question and have not altered the wording of any of the questions on this form.

## ICMJE DISCLOSURE FORM

**Date:** 5/18/2022

**Your Name:** Takao Anzai

**Manuscript Title:** POLY(2-METHOXYETHYL ACRYLATE) (PMEA) IMPROVES THROMBORESISTANCE OF FRED FLOW DIVERTERS: A THROMBOGENIC EVALUATION OF THE FLOW DIVERTERS WITH HUMAN BLOOD UNDER FLOW CONDITIONS

**Manuscript Number (if known):** [Click or tap here to enter text.](#)

In the interest of transparency, we ask you to disclose all relationships/activities/interests listed below that are related to the content of your manuscript. "Related" means any relation with for-profit or not-for-profit third parties whose interests may be affected by the content of the manuscript. Disclosure represents a commitment to transparency and does not necessarily indicate a bias. If you are in doubt about whether to list a relationship/activity/interest, it is preferable that you do so.

The author's relationships/activities/interests should be defined broadly. For example, if your manuscript pertains to the epidemiology of hypertension, you should declare all relationships with manufacturers of antihypertensive medication, even if that medication is not mentioned in the manuscript.

In item #1 below, report all support for the work reported in this manuscript without time limit. For all other items, the time frame for disclosure is the past 36 months.

|                                                    | Name all entities with whom you have this relationship or indicate none (add rows as needed)                                                                                   | Specifications/Comments (e.g., if payments were made to you or to your institution)                                                                                                                                                                                                                                                                                          |                   |  |                  |  |                                      |                                           |
|----------------------------------------------------|--------------------------------------------------------------------------------------------------------------------------------------------------------------------------------|------------------------------------------------------------------------------------------------------------------------------------------------------------------------------------------------------------------------------------------------------------------------------------------------------------------------------------------------------------------------------|-------------------|--|------------------|--|--------------------------------------|-------------------------------------------|
| Time frame: Since the initial planning of the work |                                                                                                                                                                                |                                                                                                                                                                                                                                                                                                                                                                              |                   |  |                  |  |                                      |                                           |
| <b>1</b>                                           | All support for the present manuscript (e.g., funding, provision of study materials, medical writing, article processing charges, etc.)<br><b>No time limit for this item.</b> | <input type="checkbox"/> <b>None</b><br><table border="1" style="width: 100%; border-collapse: collapse;"> <tr> <td style="width: 60%;">MicroVention Inc.</td> <td></td> </tr> <tr> <td>Terumo Co., Ltd.</td> <td></td> </tr> <tr> <td>Hyperion Medical Communications, LLC</td> <td style="font-size: small;">Click the tab key to add additional rows.</td> </tr> </table> | MicroVention Inc. |  | Terumo Co., Ltd. |  | Hyperion Medical Communications, LLC | Click the tab key to add additional rows. |
| MicroVention Inc.                                  |                                                                                                                                                                                |                                                                                                                                                                                                                                                                                                                                                                              |                   |  |                  |  |                                      |                                           |
| Terumo Co., Ltd.                                   |                                                                                                                                                                                |                                                                                                                                                                                                                                                                                                                                                                              |                   |  |                  |  |                                      |                                           |
| Hyperion Medical Communications, LLC               | Click the tab key to add additional rows.                                                                                                                                      |                                                                                                                                                                                                                                                                                                                                                                              |                   |  |                  |  |                                      |                                           |
| Time frame: past 36 months                         |                                                                                                                                                                                |                                                                                                                                                                                                                                                                                                                                                                              |                   |  |                  |  |                                      |                                           |
| <b>2</b>                                           | Grants or contracts from any entity (if not indicated in item #1 above).                                                                                                       | <input checked="" type="checkbox"/> <b>None</b><br><table border="1" style="width: 100%; border-collapse: collapse;"> <tr><td style="width: 60%; height: 20px;"></td><td></td></tr> <tr><td style="height: 20px;"></td><td></td></tr> <tr><td style="height: 20px;"></td><td></td></tr> </table>                                                                             |                   |  |                  |  |                                      |                                           |
|                                                    |                                                                                                                                                                                |                                                                                                                                                                                                                                                                                                                                                                              |                   |  |                  |  |                                      |                                           |
|                                                    |                                                                                                                                                                                |                                                                                                                                                                                                                                                                                                                                                                              |                   |  |                  |  |                                      |                                           |
|                                                    |                                                                                                                                                                                |                                                                                                                                                                                                                                                                                                                                                                              |                   |  |                  |  |                                      |                                           |

|           |                                                                                                              | Name all entities with whom you have this relationship or indicate none (add rows as needed) | Specifications/Comments (e.g., if payments were made to you or to your institution) |
|-----------|--------------------------------------------------------------------------------------------------------------|----------------------------------------------------------------------------------------------|-------------------------------------------------------------------------------------|
| <b>3</b>  | Royalties or licenses                                                                                        | <input checked="" type="checkbox"/> <b>None</b>                                              |                                                                                     |
|           |                                                                                                              |                                                                                              |                                                                                     |
|           |                                                                                                              |                                                                                              |                                                                                     |
| <b>4</b>  | Consulting fees                                                                                              | <input checked="" type="checkbox"/> <b>None</b>                                              |                                                                                     |
|           |                                                                                                              |                                                                                              |                                                                                     |
|           |                                                                                                              |                                                                                              |                                                                                     |
| <b>5</b>  | Payment or honoraria for lectures, presentations, speakers bureaus, manuscript writing or educational events | <input checked="" type="checkbox"/> <b>None</b>                                              |                                                                                     |
|           |                                                                                                              |                                                                                              |                                                                                     |
|           |                                                                                                              |                                                                                              |                                                                                     |
| <b>6</b>  | Payment for expert testimony                                                                                 | <input checked="" type="checkbox"/> <b>None</b>                                              |                                                                                     |
|           |                                                                                                              |                                                                                              |                                                                                     |
|           |                                                                                                              |                                                                                              |                                                                                     |
| <b>7</b>  | Support for attending meetings and/or travel                                                                 | <input checked="" type="checkbox"/> <b>None</b>                                              |                                                                                     |
|           |                                                                                                              |                                                                                              |                                                                                     |
|           |                                                                                                              |                                                                                              |                                                                                     |
| <b>8</b>  | Patents planned, issued or pending                                                                           | <input checked="" type="checkbox"/> <b>None</b>                                              |                                                                                     |
|           |                                                                                                              |                                                                                              |                                                                                     |
|           |                                                                                                              |                                                                                              |                                                                                     |
| <b>9</b>  | Participation on a Data Safety Monitoring Board or Advisory Board                                            | <input checked="" type="checkbox"/> <b>None</b>                                              |                                                                                     |
|           |                                                                                                              |                                                                                              |                                                                                     |
|           |                                                                                                              |                                                                                              |                                                                                     |
| <b>10</b> | Leadership or fiduciary role in other board,                                                                 | <input checked="" type="checkbox"/> <b>None</b>                                              |                                                                                     |
|           |                                                                                                              |                                                                                              |                                                                                     |

|                                                                                                                                                                                                                                                               |                                                                                  | Name all entities with whom you have this relationship or indicate none (add rows as needed) | Specifications/Comments (e.g., if payments were made to you or to your institution) |
|---------------------------------------------------------------------------------------------------------------------------------------------------------------------------------------------------------------------------------------------------------------|----------------------------------------------------------------------------------|----------------------------------------------------------------------------------------------|-------------------------------------------------------------------------------------|
|                                                                                                                                                                                                                                                               | society, committee or advocacy group, paid or unpaid                             |                                                                                              |                                                                                     |
| <b>11</b>                                                                                                                                                                                                                                                     | Stock or stock options                                                           | <input checked="" type="checkbox"/> <b>None</b>                                              |                                                                                     |
|                                                                                                                                                                                                                                                               |                                                                                  |                                                                                              |                                                                                     |
|                                                                                                                                                                                                                                                               |                                                                                  |                                                                                              |                                                                                     |
| <b>12</b>                                                                                                                                                                                                                                                     | Receipt of equipment, materials, drugs, medical writing, gifts or other services | <input checked="" type="checkbox"/> <b>None</b>                                              |                                                                                     |
|                                                                                                                                                                                                                                                               |                                                                                  |                                                                                              |                                                                                     |
|                                                                                                                                                                                                                                                               |                                                                                  |                                                                                              |                                                                                     |
| <b>13</b>                                                                                                                                                                                                                                                     | Other financial or non-financial interests                                       | <input checked="" type="checkbox"/> <b>None</b>                                              |                                                                                     |
|                                                                                                                                                                                                                                                               |                                                                                  |                                                                                              |                                                                                     |
|                                                                                                                                                                                                                                                               |                                                                                  |                                                                                              |                                                                                     |
| <p><b>Please place an "X" next to the following statement to indicate your agreement:</b></p> <p><input checked="" type="checkbox"/> I certify that I have answered every question and have not altered the wording of any of the questions on this form.</p> |                                                                                  |                                                                                              |                                                                                     |
